# Supplementary material for: Targeting membrane fragility in LGMD R2 through pharmacological autophagy induction
Source: Research Square preprint supplement (doi:10.21203/rs.3.rs-6671973/v1), 2025-07-14

## **Supplementary Information**

### **Targeting Membrane Fragility in LGMD R2 through Pharmacological Autophagy Induction**

Noëlla Grossi, Emilie Pellier, Quentin Miagoux, Manon Benabides, Jerome Polentes, Celine Leteur, Celine Bruge, Xavier Nissan

## Supplementary figure legends

**Figure S1. Selected doses of screened molecules and cell viability after 24 hours of treatment. (A)** Quantification of the cell viability of S1173X dysferlin myoblasts after 24 hours of treatment with the different drugs relative to the control DMSO 0.1%. **(B)** Table summarizing the doses of compounds tested and cell viability after 24 hours of treatment.

**Figure S2. Characterization of autophagic fluxes on the S1173X dysferlin myoblasts treated with all the compounds. (A)** Formation of lysosome positive structures under control of different treatments after 24 hours. Representative confocal images depicting lysosomes (green) puncta in *DYSF<sup>S1173X</sup>* immortalized myoblasts treated with 0.1% DMSO or each compound for 24 hours. Hoechst staining (blue) labels nuclei. Scale bar = 50  $\mu$ m. **(B)** Formation of p62 positive structures under control of different treatments after 24 hours. Representative confocal images depicting p62 (red) puncta in *DYSF<sup>S1173X</sup>* immortalized myoblasts treated with 0.1% DMSO or each compound for 24 hours. Hoechst staining (blue) labels nuclei. Scale bar = 50  $\mu$ m.

**Figure S3. Ability of the molecules tested to modulate autophagy on healthy myoblasts. (A)** Dot plot representation of the effects of the 17 compounds on lysosome expression after 24 hours of treatment and cell viability. **(B)** Quantification of total lysosome puncta area following treatment relative to the control DMSO 0.1%, using MetaXpress software. Each bar represents the mean  $\pm$  SD (n=3). **(C)** Dot plot representation of the effects of the 17 compounds on p62 expression after 24 hours of treatment and cell viability. **(D)** Quantification of total p62 puncta area following treatment relative to the control DMSO 0.1%, using HCS Studio software. Each bar represents the mean  $\pm$  SD (n=3). Abbreviations: NR, Nicotinamide riboside, NMN, nicotinamide mononucleotide.

**Figure S4. Characterization of autophagic fluxes on healthy myoblasts treated with all the compounds. (A)** Formation of lysosome positive structures under control of different treatments. Representative confocal images depicting lysosomes (green) puncta in *DYSF<sup>S1173X</sup>* immortalized myoblasts treated with 0.1% DMSO or each compound for 24 hours. Hoechst staining (blue) labels nuclei. Scale bar = 50  $\mu$ m. **(B)** Formation of p62 positive structures under control or each 6 effective compounds for 24 hours. Representative confocal images depicting p62 (red) puncta in *DYSF<sup>S1173X</sup>* immortalized myoblasts treated with 0.1% DMSO or each compound for 24 hours. Hoechst staining (blue) labels nuclei. Scale bar = 50  $\mu$ m.

**Supplementary figure S5. Full-length western blot gels shown in figure 5C. (A)** Uncropped western blot analysis of p62 expression in myoblasts treated with 0,1% DMSO or each 6 effective compounds for 24 hours. **(B)** Uncropped western blot analysis of Lc3 expression in the same cell extracts. **(C)** Uncropped western blot analysis of p62 and Lc3 expression in the same cell extracts. **(D)** Uncropped western blot analysis of  $\beta$ -actin expression in the same cell extracts.

## Supplementary figure 1

**A**

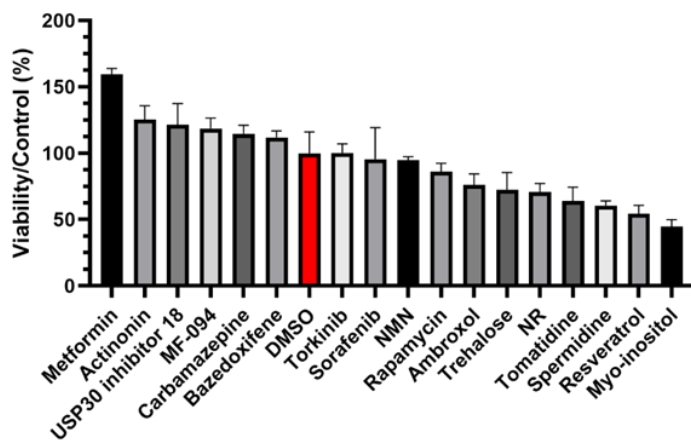

**B**

| Compound            | Concentration | Cell viability / Control (%) |
|---------------------|---------------|------------------------------|
| <b>DMSO</b>         | <b>0,1%</b>   | <b>100</b>                   |
| Torkinib            | 10 µM         | 100                          |
| Rapamycin           | 20 µM         | 86                           |
| Resveratrol         | 300 µM        | 54                           |
| Spermidine          | 100 µM        | 61                           |
| NR                  | 100 µM        | 71                           |
| NMN                 | 300 µM        | 95                           |
| Actinonin           | 10 µM         | 125                          |
| Tomatidine          | 10 µM         | 64                           |
| Trehalose           | 50 mM         | 73                           |
| Myo-inositol        | 50 mM         | 45                           |
| Ambroxol            | 10 µM         | 76                           |
| Carbamazepine       | 30 µM         | 115                          |
| MF-094              | 10 µM         | 119                          |
| USP 30 inhibitor 18 | 10 µM         | 121                          |
| Sorafenib           | 10 µM         | 96                           |
| Metformin           | 200 µM        | 159                          |
| Bazedoxifene        | 2 µM          | 112                          |

Supplementary figure 2

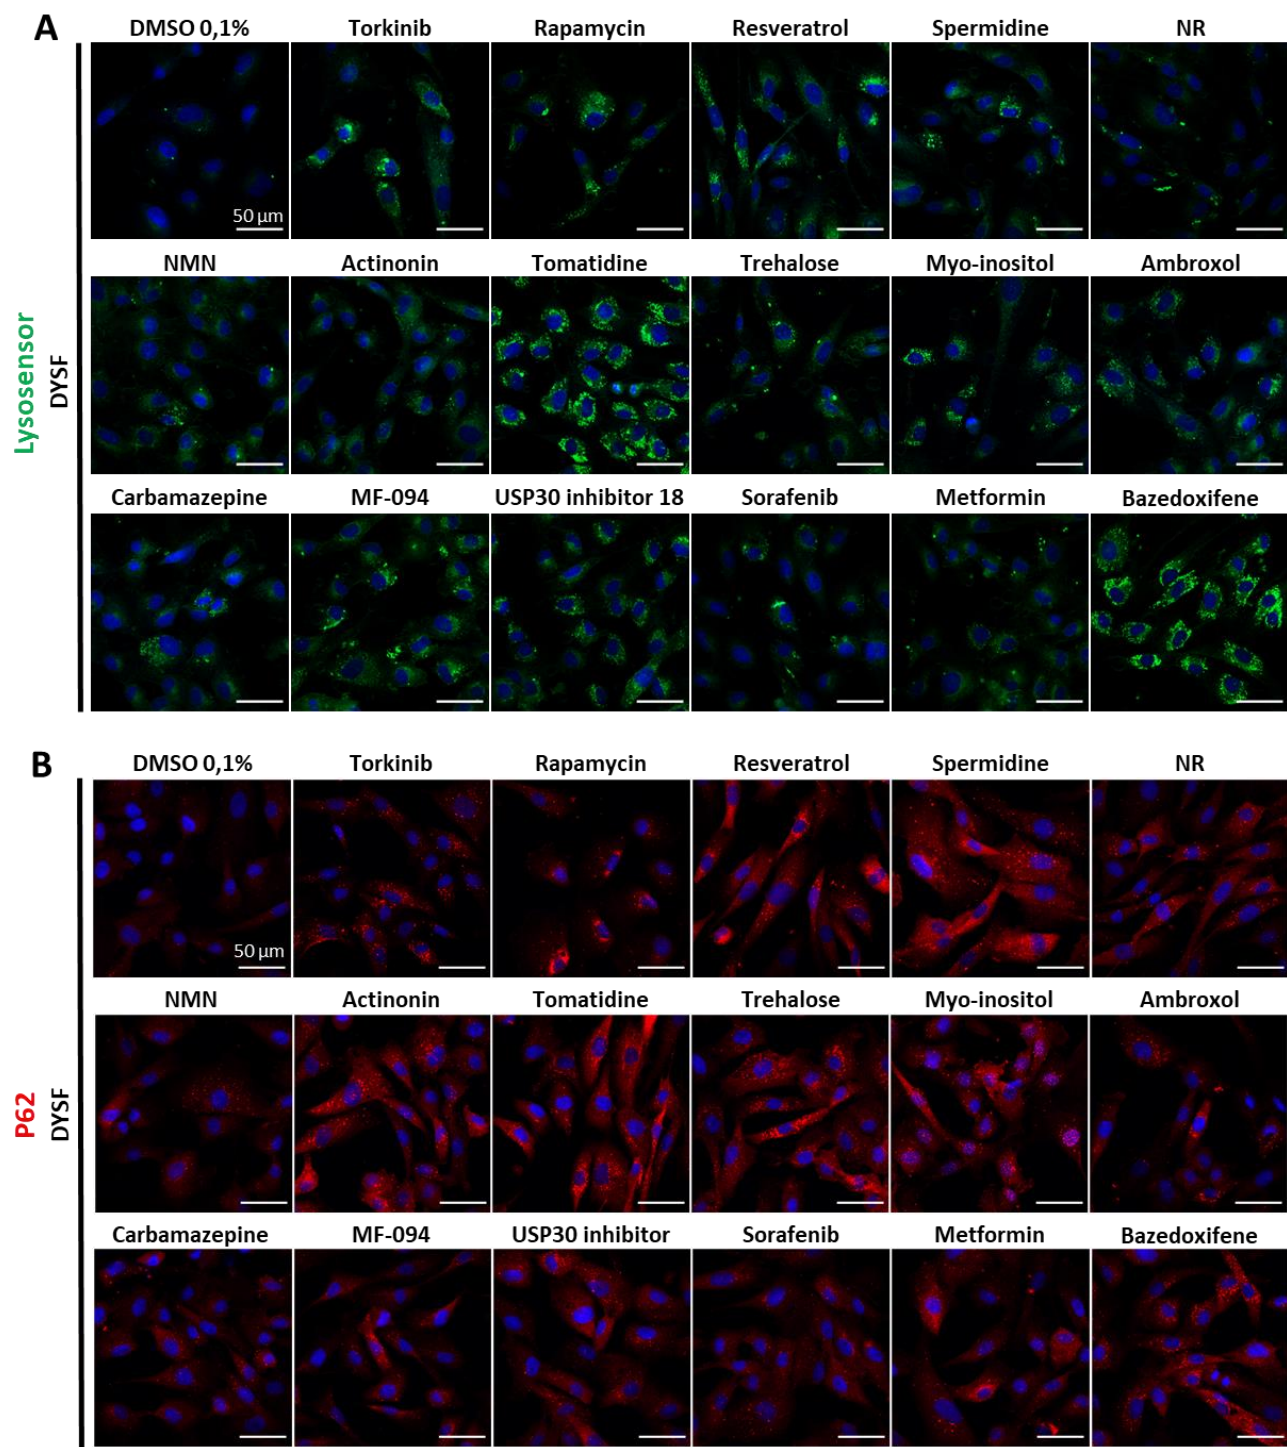

Supplementary figure 3

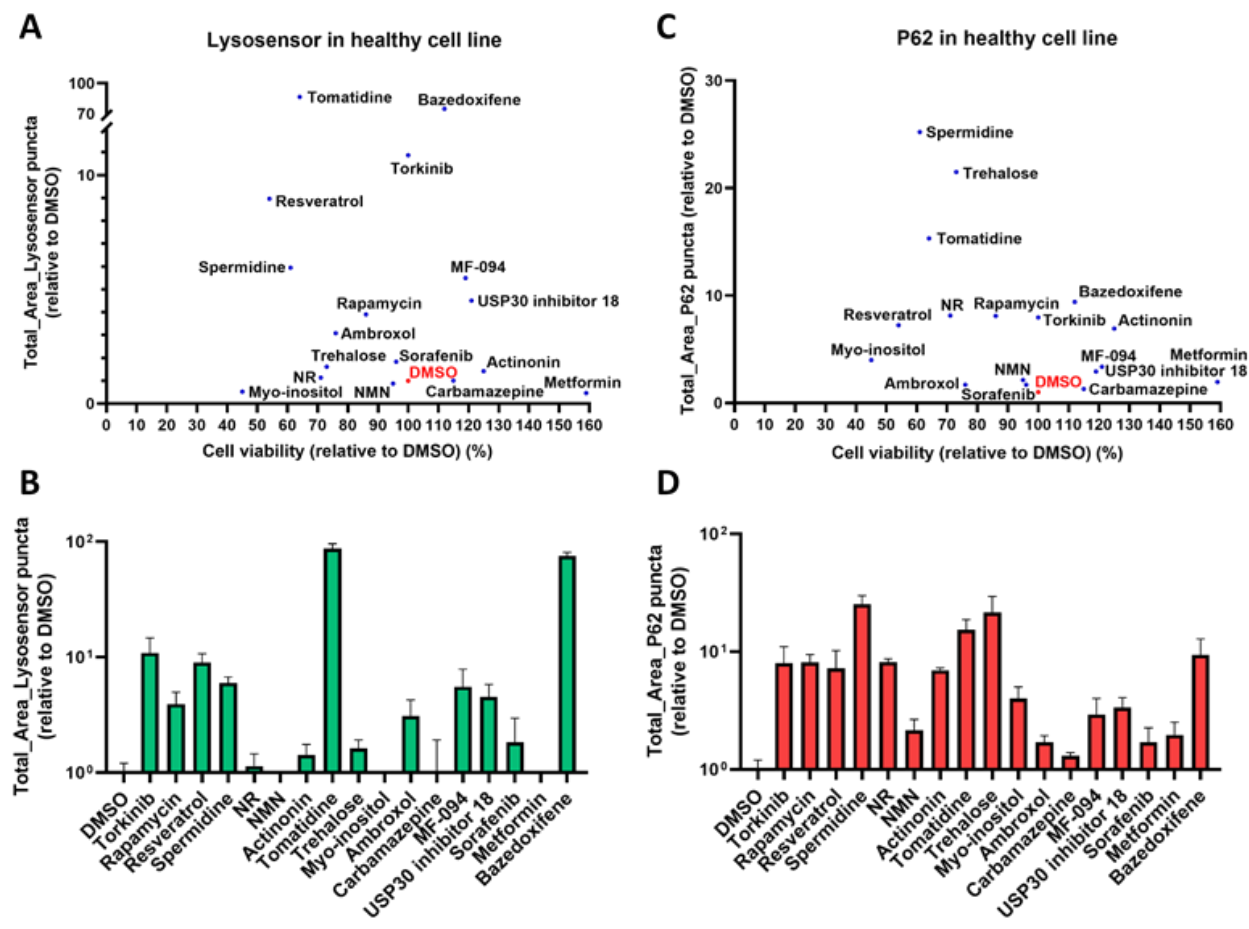



Supplementary figure 4

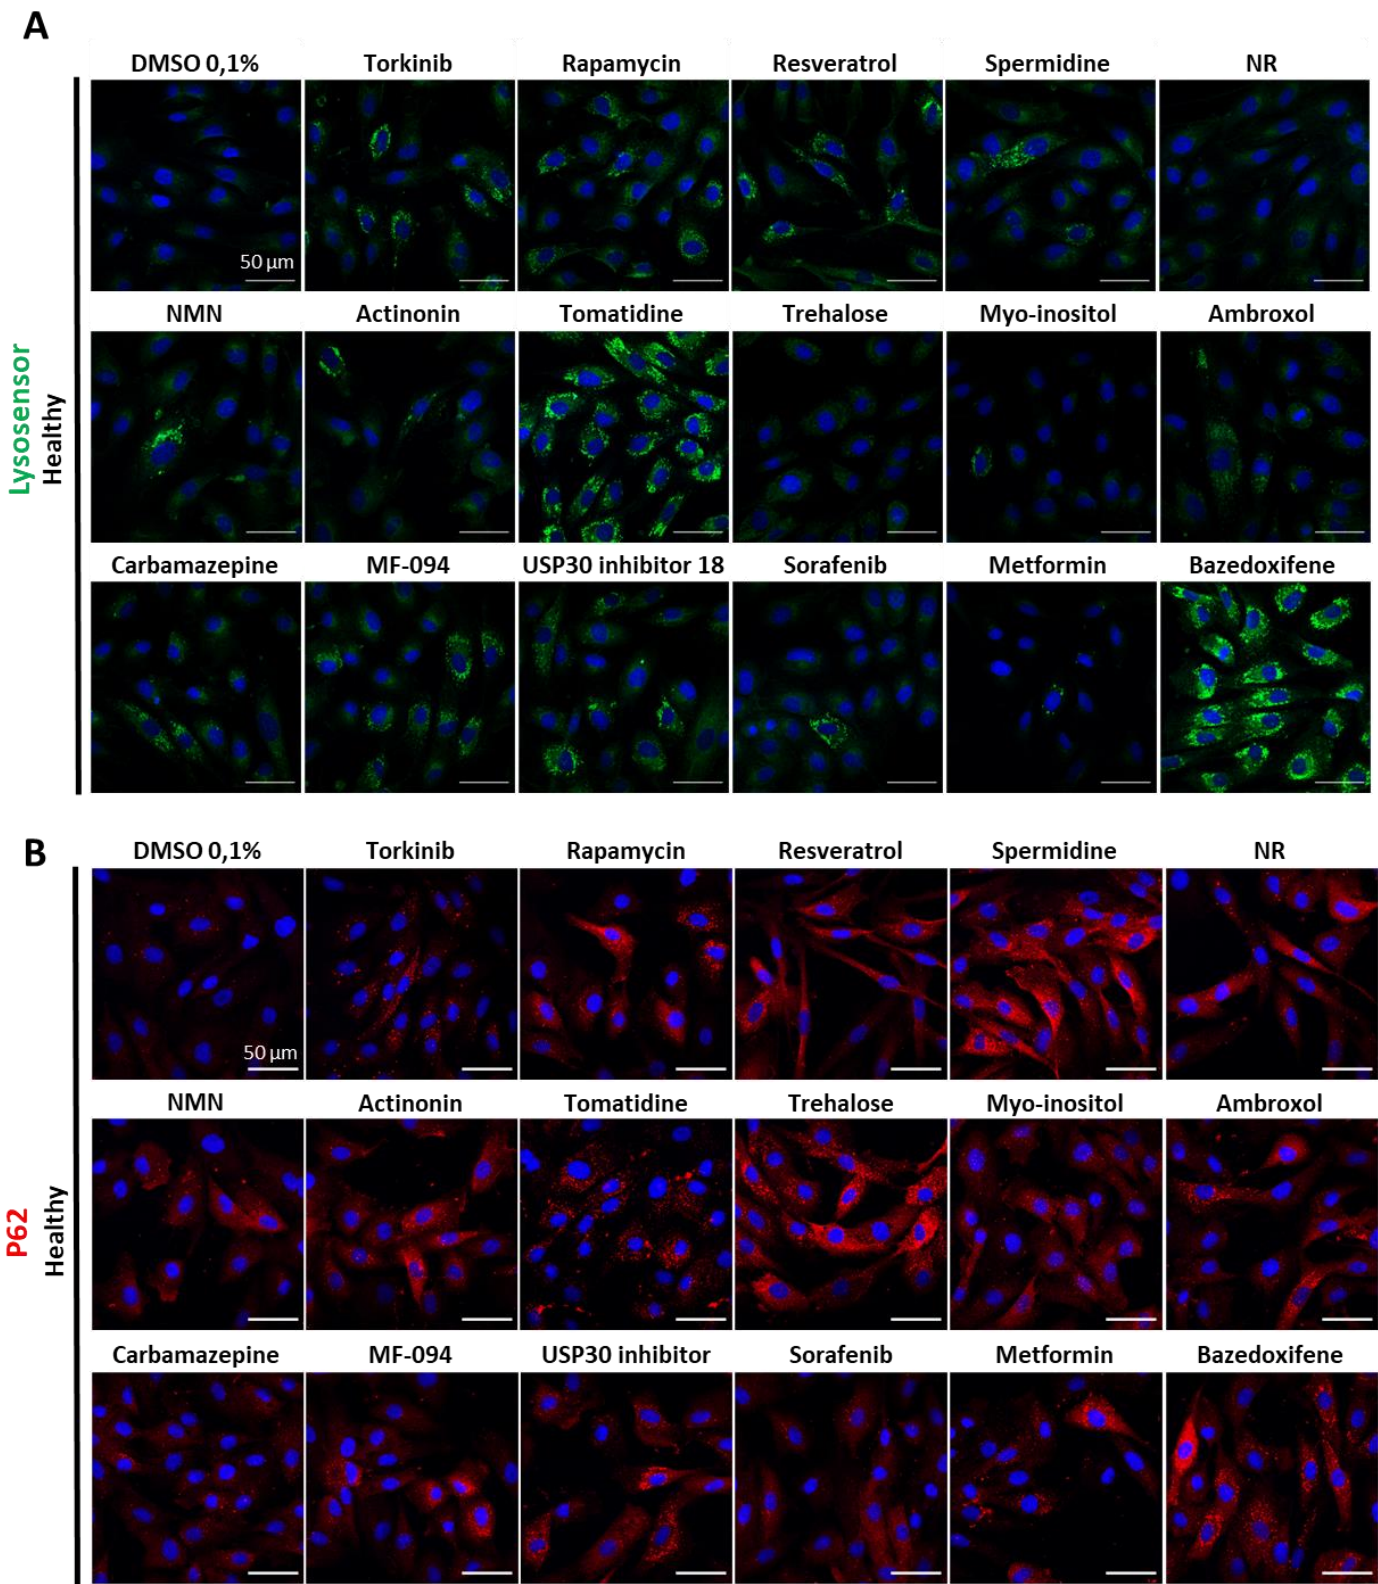

Supplementary figure 5

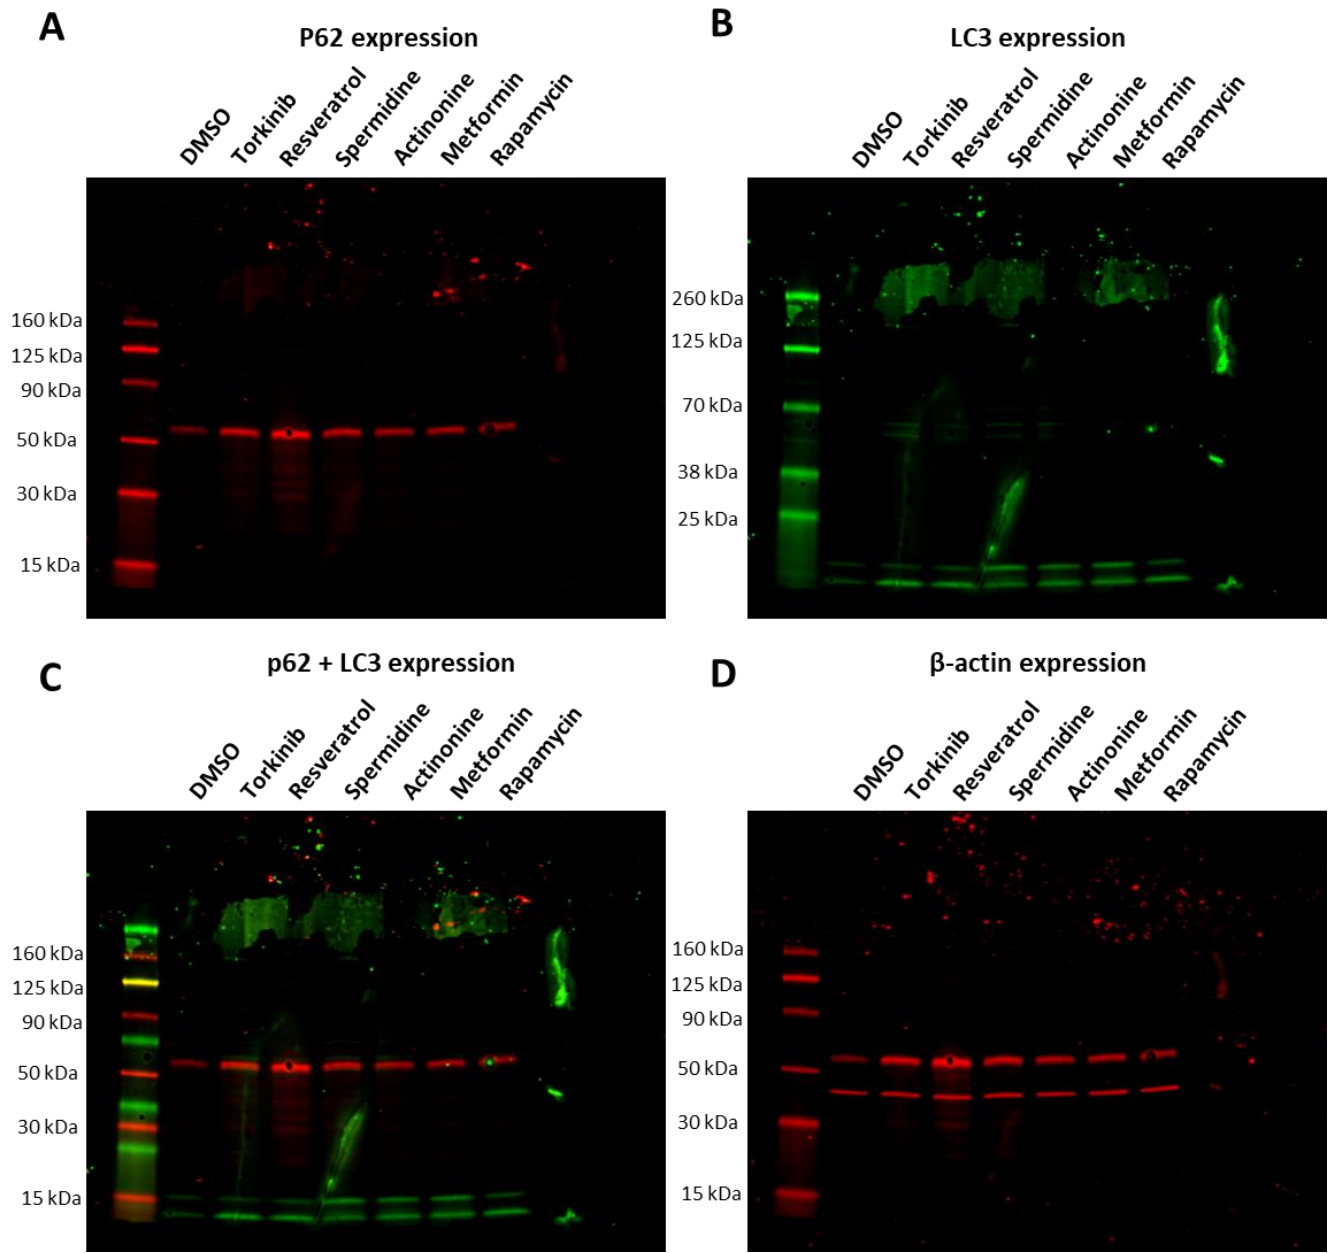

Supplement: Supplementary file 1 [file ba1eba8750b6d82229a31998.pdf]
